# Supplementary material
Source: publisher figshare collection journal article supplement (https://karger.figshare.com/ndownloader/files/14312582)
Supplement: Supplementary file 1 [file 14312582]

## Supplementary Table 1

Predictors used in derivation models for the prediction of early childhood obesity or overweight.

|                        |                                                                         | INFANT                        |                              |                               |           |                 |            |                  |     |                                | PREGNANCY                |                         |                   |        | MOTHER       |                    |                              |                    |                     |                            | OTHER                       |                  |              |                   |   |
|------------------------|-------------------------------------------------------------------------|-------------------------------|------------------------------|-------------------------------|-----------|-----------------|------------|------------------|-----|--------------------------------|--------------------------|-------------------------|-------------------|--------|--------------|--------------------|------------------------------|--------------------|---------------------|----------------------------|-----------------------------|------------------|--------------|-------------------|---|
| STUDY                  | OUTCOME                                                                 | Age at introduction of solids | Birth weight (z-score or kg) | Breastfeeding (any/exclusive) | Ethnicity | Gestational age | Infant BMI | Height or length | Sex | Weight gain (z-score or rapid) | Smoking during pregnancy | Gestational weight gain | Hospital delivery | Parity | Maternal age | Maternal education | Maternal English proficiency | Maternal ethnicity | Maternal occupation | Maternal pre-pregnancy BMI | Number of household members | Parental obesity | Paternal BMI | Household smoking |   |
| Levine et al. 2012     | Overweight/obesity at 5 years of age                                    | -                             | ✓                            | -                             | ✓         | -               | -          | -                | -   | ✓                              | -                        | -                       | -                 | -      | -            | ✓                  | -                            | -                  | -                   | -                          | -                           | -                | ✓            | -                 | - |
| Morandi et al. 2012    | Obesity at 7 years of age                                               | -                             | ✓                            | -                             | -         | -               | -          | -                | -   | -                              | ✓                        | -                       | -                 | -      | -            | -                  | -                            | -                  | -                   | ✓                          | ✓                           | ✓                | -            | ✓                 | - |
|                        | Overweight/obesity at 7 years of age                                    | -                             | ✓                            | -                             | -         | -               | -          | -                | -   | -                              | ✓                        | ✓                       | -                 | -      | -            | -                  | -                            | -                  | -                   | -                          | ✓                           | ✓                | -            | ✓                 | - |
| Robson et al. 2016     | Obesity at 5 years of age <sup>1</sup>                                  | -                             | ✓                            | ✓                             | -         | -               | -          | -                | -   | ✓                              | -                        | -                       | -                 | -      | ✓            | -                  | -                            | -                  | -                   | -                          | ✓                           | -                | -            | -                 | - |
|                        | Obesity at 5 years of age <sup>2</sup>                                  | ✓                             | ✓                            | ✓                             | -         | -               | -          | -                | ✓   | ✓                              | -                        | -                       | -                 | ✓      | ✓            | -                  | ✓                            | -                  | -                   | -                          | ✓                           | -                | -            | -                 | - |
| Santorelli et al. 2013 | Obesity at 2 years of age <sup>3</sup>                                  | -                             | ✓                            | -                             | -         | ✓               | -          | -                | -   | ✓                              | -                        | -                       | -                 | -      | -            | -                  | -                            | ✓                  | -                   | -                          | ✓                           | -                | -            | -                 | - |
| Steur et al. 2011      | Overweight/obesity at 8 years of age                                    | -                             | ✓                            | -                             | -         | -               | -          | -                | ✓   | -                              | -                        | -                       | ✓                 | -      | -            | -                  | -                            | -                  | -                   | -                          | ✓                           | -                | -            | ✓                 | ✓ |
| Weng et al. 2013       | Overweight/obesity at 3 years of age                                    | -                             | ✓                            | ✓                             | -         | -               | -          | -                | ✓   | ✓                              | ✓                        | -                       | -                 | -      | -            | -                  | -                            | -                  | -                   | -                          | ✓                           | -                | -            | ✓                 | - |
| Zhang et al. 2009      | Overweight/obesity at 3 years of age from data by 6 weeks <sup>4</sup>  | -                             | ✓                            | -                             | -         | -               | -          | ✓                | ✓   | ✓                              | -                        | -                       | -                 | -      | -            | -                  | -                            | -                  | -                   | -                          | -                           | -                | -            | -                 | - |
|                        | Overweight/obesity at 3 years of age from data by 8 months <sup>4</sup> | -                             | ✓                            | -                             | -         | -               | ✓          | ✓                | ✓   | ✓                              | -                        | -                       | -                 | -      | -            | -                  | -                            | -                  | -                   | -                          | -                           | -                | -            | -                 | - |
|                        | Overweight/obesity at 3 years of age from data by 8 months <sup>5</sup> | -                             | ✓                            | -                             | -         | ✓               | ✓          | ✓                | ✓   | ✓                              | -                        | -                       | -                 | -      | -            | -                  | -                            | -                  | -                   | -                          | -                           | -                | -            | -                 | - |

<sup>1</sup> Robson et al.'s reduced model. <sup>2</sup> Robson et al.'s full model <sup>3</sup> Santorelli et al. developed 3 models, i.e., one for use at 6±1.5 months (equation 1), a second for use at 9±1.5 months (equation 2), and the third for use at 12±1.5 months (equation 3). Only equation 1 is reported here, as results for equation 1 and equation 2 were very similar, and equation 1 was considered clinically more useful because of the earlier prediction age. <sup>4</sup> Models developed from data before 6 weeks or 8 months of age, using support vector machines (SVM) or naive Bayes. <sup>5</sup> Models developed from data before 8 months of age, using decision tree, association rules, logistic regression, neural network, linear SVM, radial basis function SVM, naive Bayesian, or Bayesian network.

## REFERENCES

- Levine RS, Dahly DL, Rudolf MCJ: Identifying infants at risk of becoming obese: Can we and should we? *Public Health* 2012;126:123-128.
- Morandi A, Meyre D, Lobbens S, Kleinman K, Kaakinen M, Rifas-Shiman SL, Vatin V, Gaget S, Pouta A, Hartikainen AL, Laitinen J, Ruokonen A, Das S, Khan AA, Elliott P, Maffei C, Gillman MW, Jarvelin MR, Froguel P: Estimation of newborn risk for child or adolescent obesity: lessons from longitudinal birth cohorts. *PLoS ONE* 2012;7:e49919.
- Robson JO, Verstraete SG, Shiboski S, Heyman MB, Wojcicki JM: A risk score for childhood obesity in an urban Latino cohort. *J Pediatr* 2016;172:29-34 e21.
- Santorelli G, Petherick ES, Wright J, Wilson B, Samiei H, Cameron N, Johnson W: Developing prediction equations and a mobile phone application to identify infants at risk of obesity. *PLoS ONE* 2013;8:e71183.
- Steur M, Smit HA, Schipper CMA, Scholtens S, Kerkhof M, de Jongste JC, Haveman-Nies A, Brunekreef B, Wijga AH: Predicting the risk of newborn children to become overweight later in childhood: The PIAMA birth cohort study. *Int J Pediatr Obes* 2011;6:e170-e178.
- Weng SF, Redsell SA, Nathan D, Swift JA, Yang M, Glazebrook C: Estimating overweight risk in childhood from predictors during infancy. *Pediatrics* 2013;132:e414-421.
- Zhang S, Tjortjis C, Zeng X, Qiao H, Buchan I, Keane J: Comparing data mining methods with logistic regression in childhood obesity prediction. *Inf Syst Front* 2009;11:449-460.
